# Supplementary material for: Syntheses and characterization of nickel(ii) and cobalt(ii) coordination polymers based on 5-bromoisophthalate anion and bis(imidazole) ligands
Source: Royal Society of Chemistry journal article supplement (doi:10.1039/c1ce05308f), 2011-01-01
Supplement: c1ce05308f.pdf [file c1ce05308f.pdf]

## Electronic Supplementary Information for

# Syntheses and Characterization of Nickel(II) and Cobalt(II) Coordination Polymers Based on 5-Bromoisophthalate Anion and Bis(imidazole) Ligands

Lu-Fang Ma<sup>a</sup>, Xiu-Qin Li<sup>a,b</sup>, Li-Ya Wang<sup>a\*</sup> and Hong-Wei Hou<sup>b\*</sup>

<sup>a</sup>(College of Chemistry and Chemical Engineering, Luoyang Normal University, Luoyang 471022, China)

<sup>b</sup>(Department of Chemistry, Zhengzhou University, Zhengzhou 450052, China)

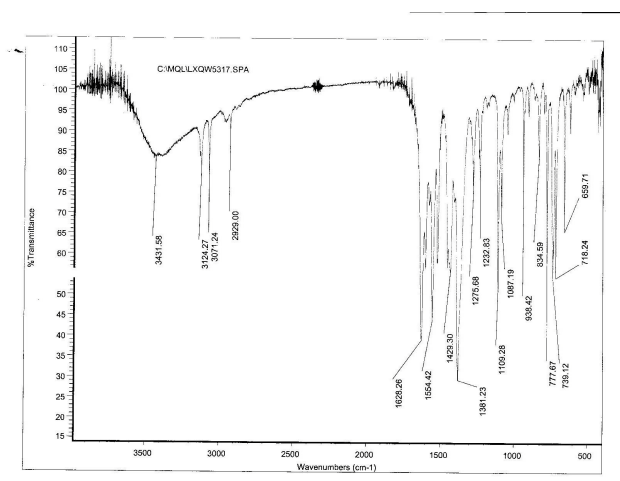

(1)

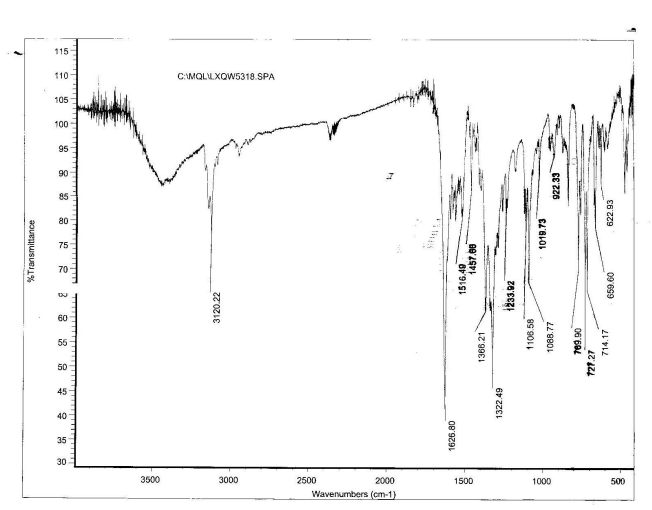

(2)

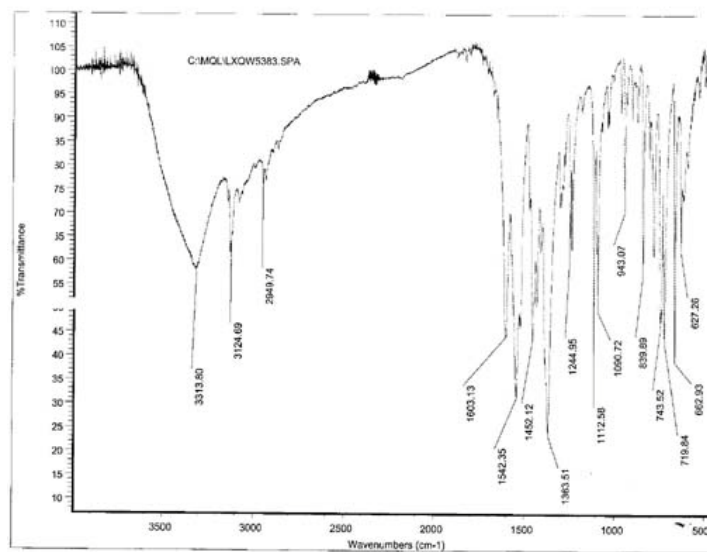

(3)

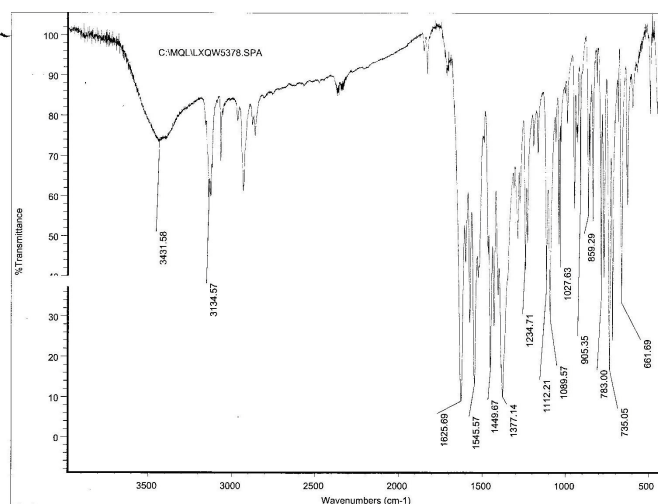

(4)

Fig S1 The IR spectra of the compounds 1–4
